# Supplementary material for: Gd-DTPA-coupled Ag2Se quantum dots for dual-modality magnetic resonance imaging and fluorescence imaging in the second near-infrared window
Source: Royal Society of Chemistry journal article supplement (doi:10.1039/c8nr02017e), 2018-01-01
Supplement: c8nr02017e1.pdf [file c8nr02017e1.pdf]

Supporting Information

**Gd-DTPA Coupled Ag<sub>2</sub>Se Quantum Dots for Dual-Modality Magnetic Resonance Imaging and  
Fluorescence Imaging in the Second Near-Infrared Window**

Jiao-Jiao Ma, †§ Ming-Xia Yu, ‡§ Zheng Zhang, ‡ Wei-Guo Cai, # Zhi-Ling Zhang, † Hui-Li Zhu, †  
Qing-Yuan Cheng, ‡ Zhi-Quan Tian \*† and Dai-Wen Pang †

† Key Laboratory of Analytical Chemistry for Biology and Medicine (Ministry of Education), College  
of Chemistry and Molecular Sciences, State Key Laboratory of Virology, The Institute for Advanced  
Studies, and Wuhan Institute of Biotechnology, Wuhan University, Wuhan, 430072, P. R. China

‡ Department of Clinical Laboratory, Zhongnan Hospital of Wuhan University, Wuhan, 430071, P. R.  
China

# Department of Radiology, Zhongnan Hospital of Wuhan University, Wuhan, 430071, P. R. China

§ These authors contributed equally to this work

\* Correspondence should be addressed to Zhi-Quan Tian ([zqtian@whu.edu.cn](mailto:zqtian@whu.edu.cn))

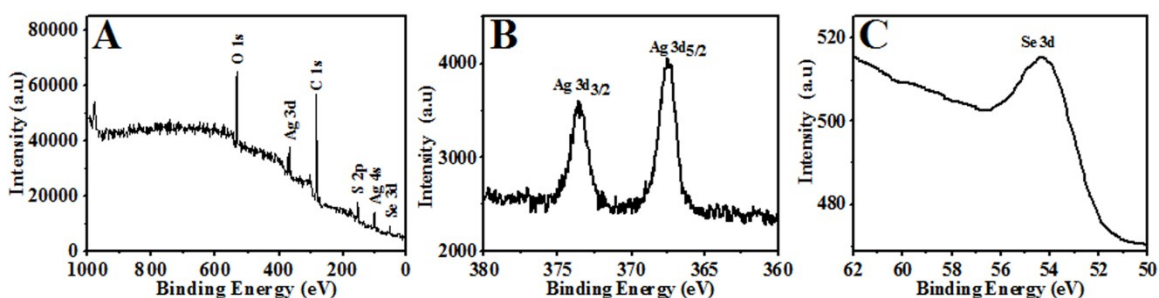

Figure S1. Characterization of hydrophobic Ag<sub>2</sub>Se QDs: (A) XPS survey spectrum, high-resolution XPS spectra of (B) Ag 3d and (C) Se 3d.

Table S1. ICP-AES results of the as-prepared Ag<sub>2</sub>Se QDs

| sample                 | c (Ag) (ppm) | c (Se) (ppm) | atomic ratio of Ag/Se |
|------------------------|--------------|--------------|-----------------------|
| Ag <sub>2</sub> Se QDs | 2.75         | 0.94         | 2.78:1                |

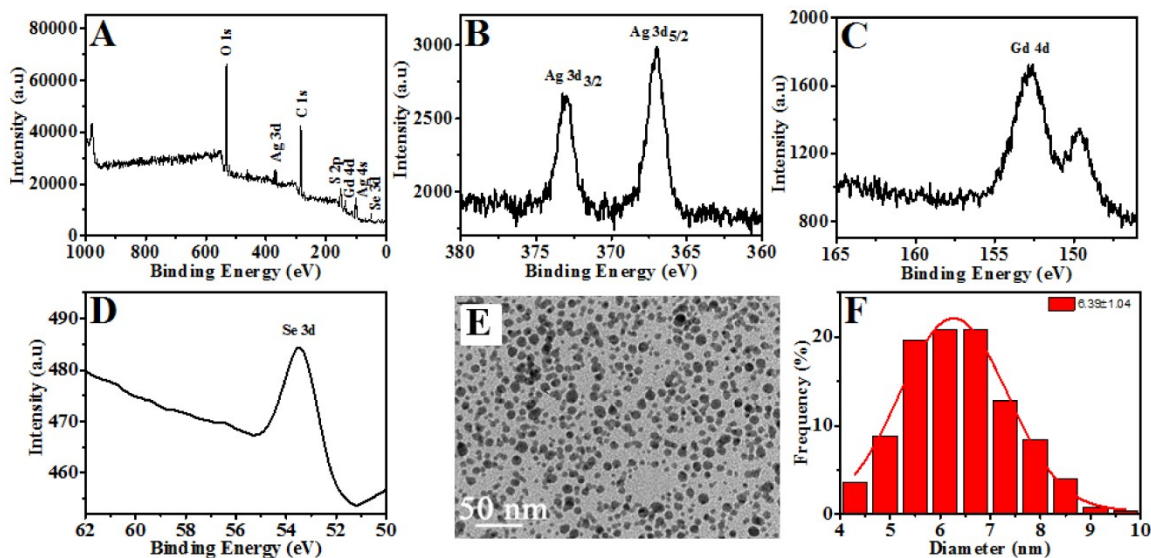

Figure S2. Characterization of the Ag<sub>2</sub>Se-Gd QDs: (A) XPS survey spectrum, high-resolution XPS spectra of (B) Ag 3d, (C) Gd 4d and (D) Se 3d. (E) TEM image, (F) corresponding size distribution histograms.

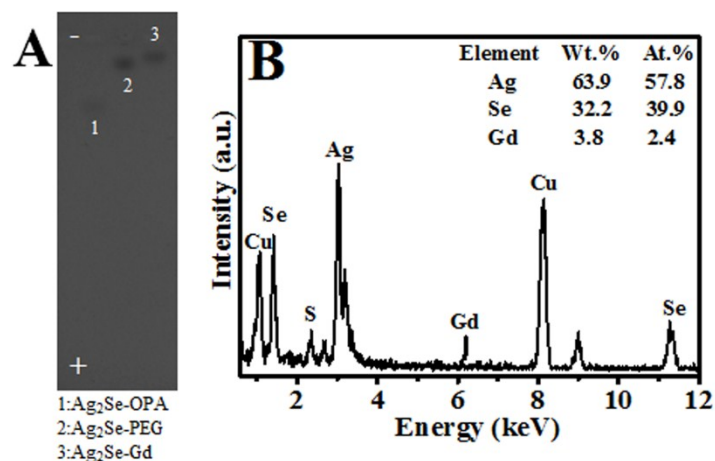

Figure S3 Characterization of the Ag<sub>2</sub>Se-Gd QDs: (A) Agarose gel electrophoresis result of Ag<sub>2</sub>Se-OPA QDs, Ag<sub>2</sub>Se-PEG QDs and Ag<sub>2</sub>Se-Gd QDs. (B) EDX image.

Table S2. ICP-AES results of the as-prepared Ag<sub>2</sub>Se-Gd QDs

| sample                    | c (Ag) (ppm) | c (Gd) (ppm) | c (Se) (ppm) |
|---------------------------|--------------|--------------|--------------|
| Ag <sub>2</sub> Se-Gd QDs | 27           | 0.26         | 9.002        |

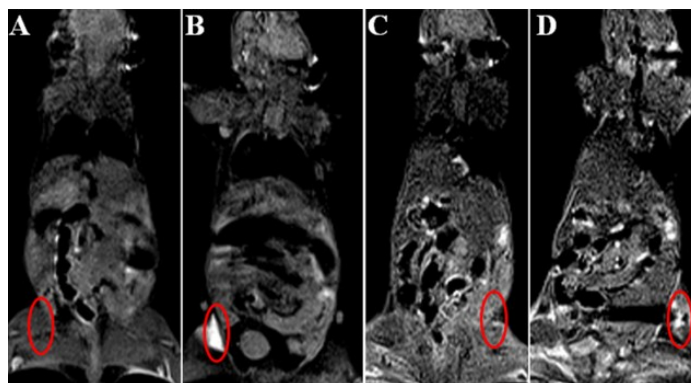

Figure S4. Comparison of *in vivo* T<sub>1</sub>-weighted MR Imaging of Ag<sub>2</sub>Se-Gd QDs with Gd-DTPA: (A, C) control group, (B) Ag<sub>2</sub>Se-Gd QDs, (D) Gd-DTPA.

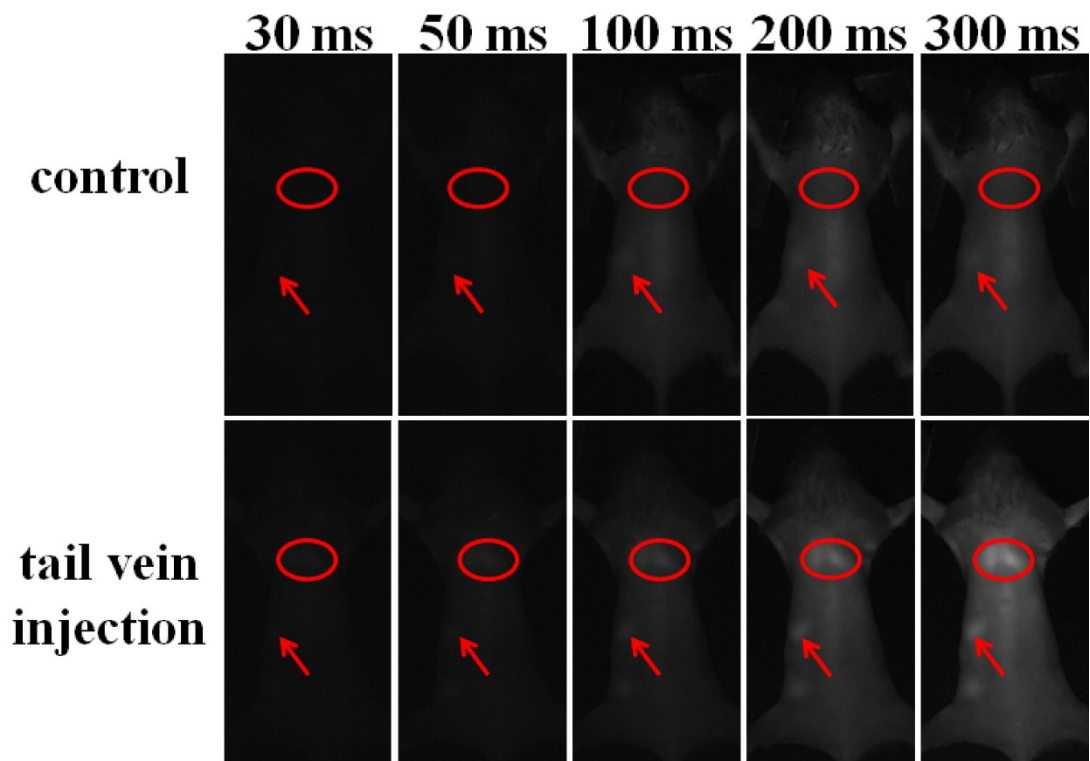

Figure S5. NIR-II fluorescence pictures of different exposure time with tail vein injection (prone position) *in vivo*.

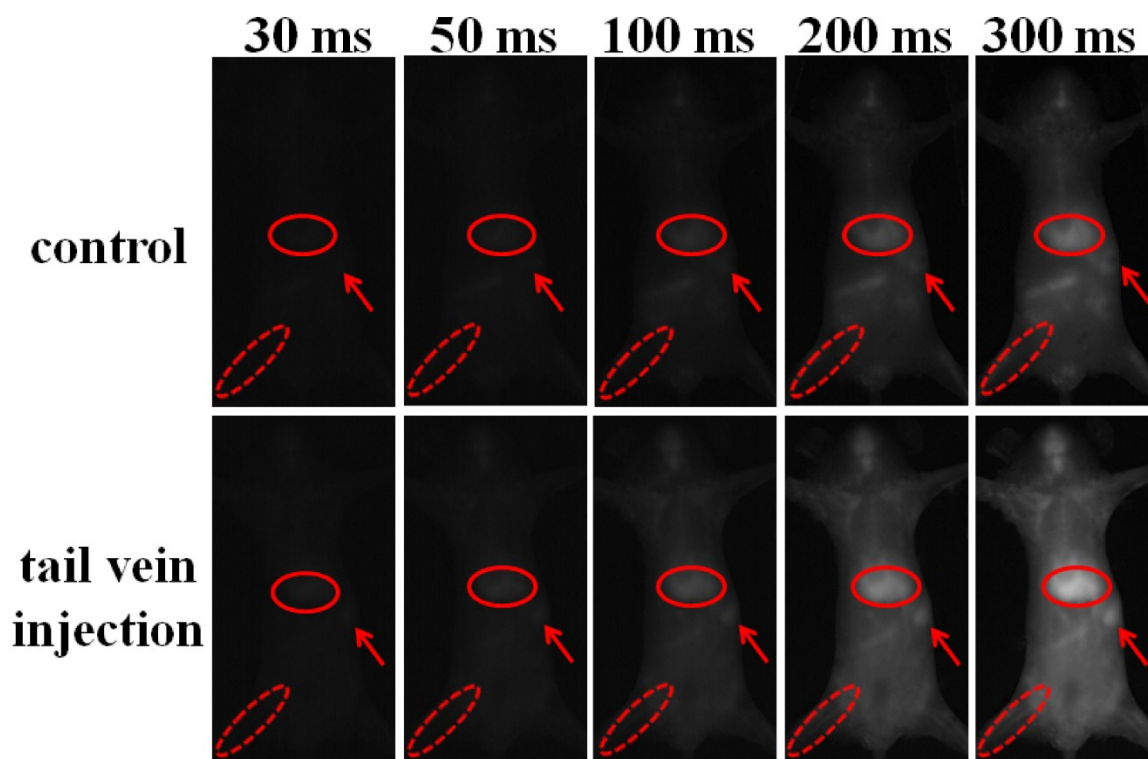

Figure S6. NIR-II fluorescence pictures of different exposure time with tail vein injection (supine position) *in vivo*.

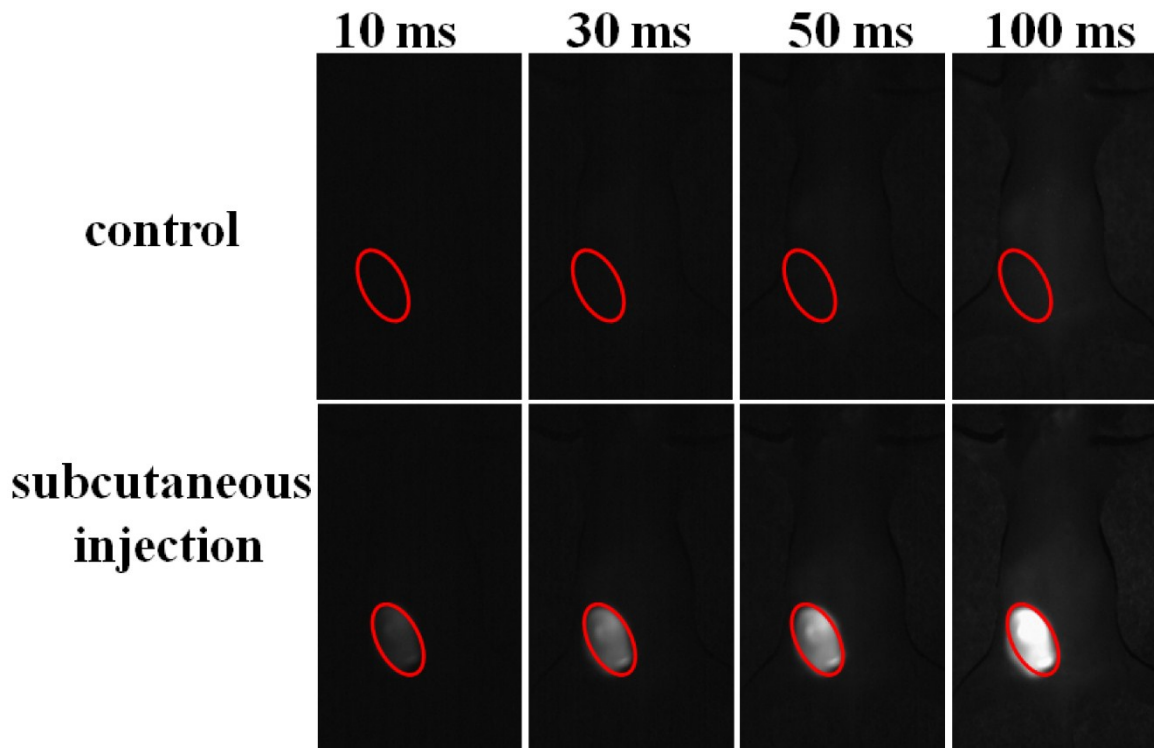

Figure S7. NIR-II fluorescence pictures of different exposure time with subcutaneous injection (prone position) *in vivo*.
